# Supplementary material for: Genome-wide association study of hippocampal atrophy rate in non-demented elders
Source: publisher site journal article supplement (doi:10.18632/aging.102470), 2019-11-23
Supplement: Supplementary file [file aging-v11i22-102470-supplementary-material-SD1.pdf]

**SUPPLEMENTARY FIGURES**

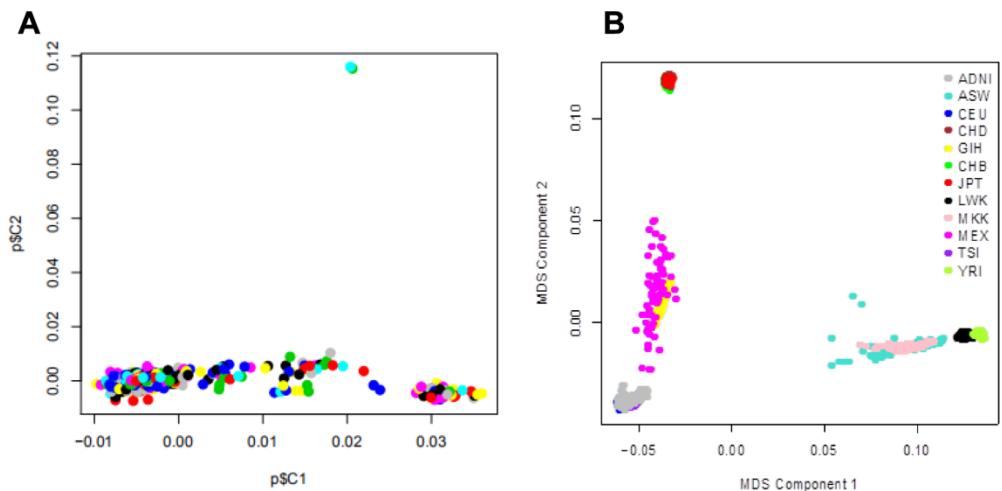

**Supplementary Figure 1. Multidimensional scaling plot of ADNI samples. Note: Cryptic relatedness and population substructure were checked with genomic identity-by-descent (IBD) and multidimensional scaling (MDS) components. (A)** MDS plot of ADNI non-Hispanic Caucasian samples. Samples seemed to form loose clusters and two samples were outliers based on the second MDS component (at top of plot; 031\_S\_4032 and 031\_S\_4203), suggesting potential population substructure. To check for cryptic relatedness, which can confound GWAS (genome-wide association study), pairwise identity-by-descent fraction ( $\pi$ ) between each pair of samples were calculated using PLINK. Four related sample pairs ( $\pi > 0.05$ ) were identified (031\_S\_4032 and 031\_S\_4203; 137\_S\_4466 and 021\_S\_0159; 023\_S\_0058 and 023\_S\_4035; 024\_S\_2239 and 024\_S\_4084), which are probably first-degree relatives. No other cryptic relations were identified from the sample, at a threshold of  $\pi > 0.05$ . **(B)** MDS plot of ADNI samples overlaid on HapMap samples. The ancestry of the HapMap participants is shown by the point color. No outlying point was shown. Abbreviations: ADNI, Alzheimer’s Disease Neuroimaging Initiative; ASW, African ancestry in Southwest USA; CEU, Utah residents with Northern and Western European ancestry from the CEPH collection; CHB, Han Chinese individuals from Beijing, China; CHD, Chinese in Metropolitan Denver, Colorado; GIH, Gujarati Indians in Houston, Texas; JPT, Tokyo, Japan; LWK, Luhya in Webuye, Kenya; MEX, Mexican ancestry in Los Angeles, California; MKK, Maasai in Kinyawa, Kenya; TSI, Tuscans in Italy; YRI, Yoruba in Ibadan, Nigeria.

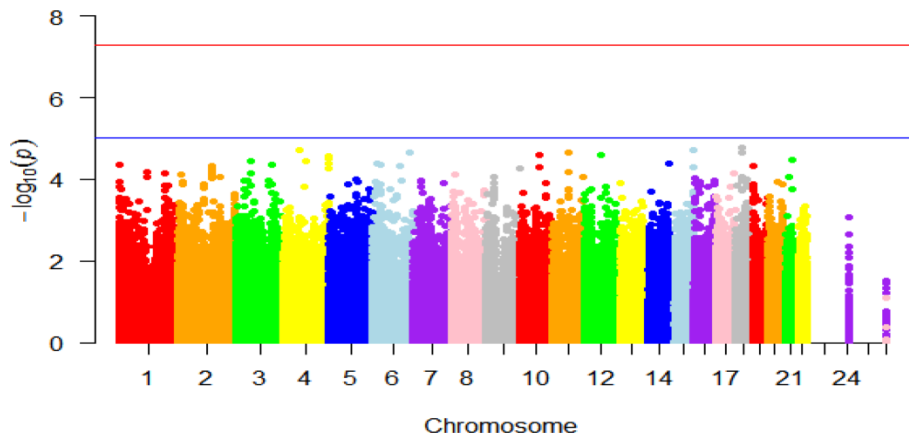

**Supplementary Figure 2: Manhattan plot for associations with hippocampal atrophy rates after controlling for *APOE*  $\epsilon 4$ .** Note: Observed  $-\log_{10}$  P-values (y-axis) are shown for all tested single nucleotide polymorphisms on each autosomal chromosome (x-axis) after controlling for age, gender, *APOE*  $\epsilon 4$  status, education, MRI (magnetic resonance imaging), ICV (intracranial volume) and the first three principal components. No genome-wide significant associations ( $P < 5 \times 10^{-8}$ ; red line) and suggestive associations ( $P < 1 \times 10^{-5}$ ; blue line) with hippocampal atrophy rates were identified.

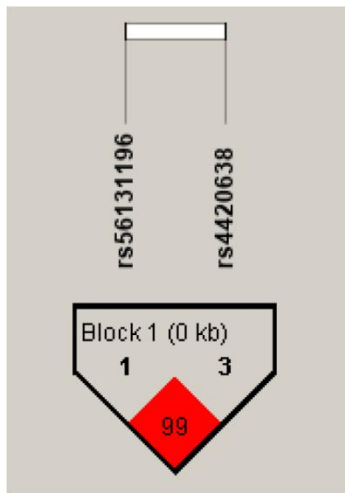

**Supplementary Figure 3. Plot of linkage disequilibrium between rs4420638 and rs56131196.**  $R^2=0.987$ ,  $D'=0.993$ .

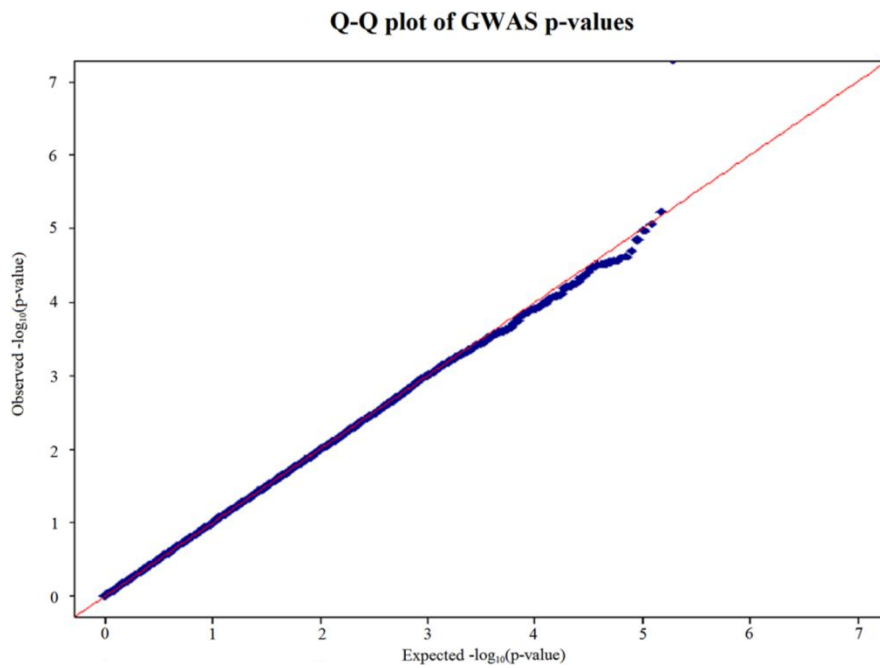

**Supplementary Figure 4: Quantile-Quantile plot.** Abbreviations: GWAS, genome-wide association study; Q-Q plot, Quantile-Quantile plot.

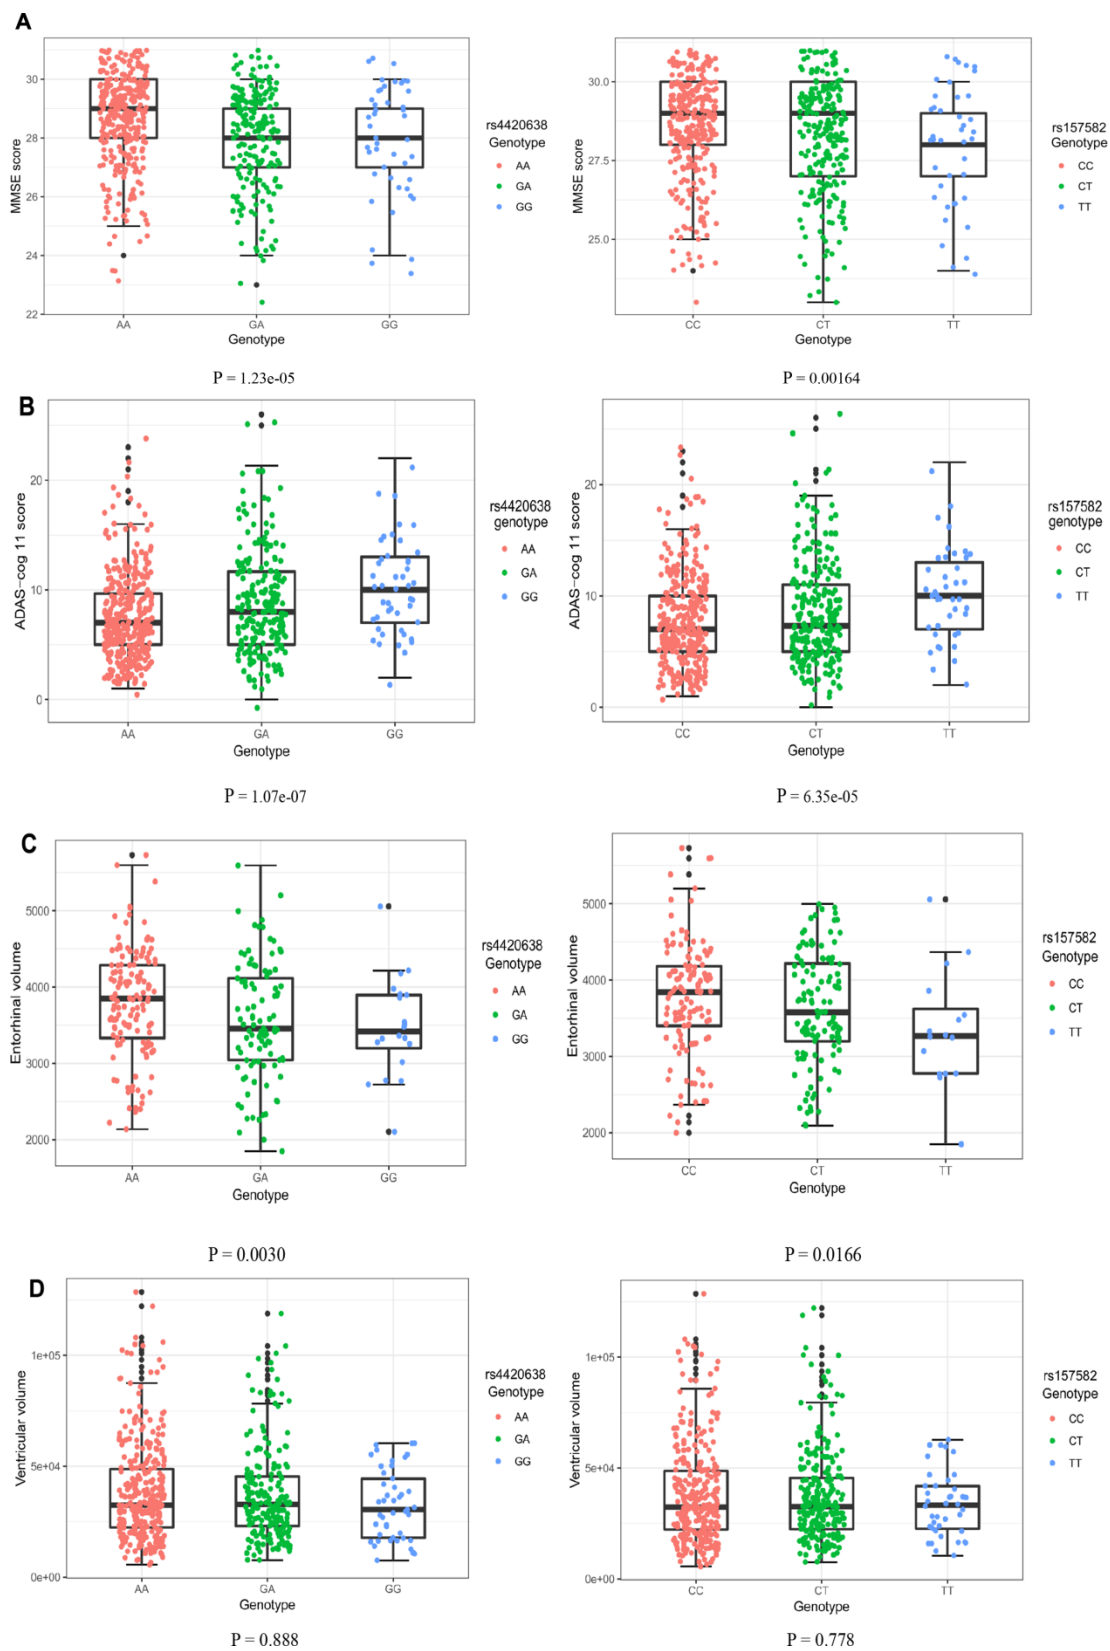

**Supplementary Figure 5. Impact of rs4420638 and rs157582 on cognitive scores and brain structures at baseline. (A)** Mini-mental State Examination (MMSE) score. **(B)** Alzheimer Disease Assessment Scale-cognitive subscale 11 (ADAS-cog 11) score. **(C)** Entorhinal volume. **(D)** Ventricular volume.

**A**

Rs4420638

**Trans-eQTLs**

| P-value               | SNP       | SNP Chr. | SNP Chr. position | Probe     | Probe Chr. | Probe Chr. position | SNP Alleles | Minor Allele | Z-score | Gene name | FDR  |
|-----------------------|-----------|----------|-------------------|-----------|------------|---------------------|-------------|--------------|---------|-----------|------|
| 1.4287226161643386E-5 | rs4420638 | 19       | 50114786          | 407003913 | 19         | 88664889            | G/A         | G            | 4.34    | -         | 0.48 |

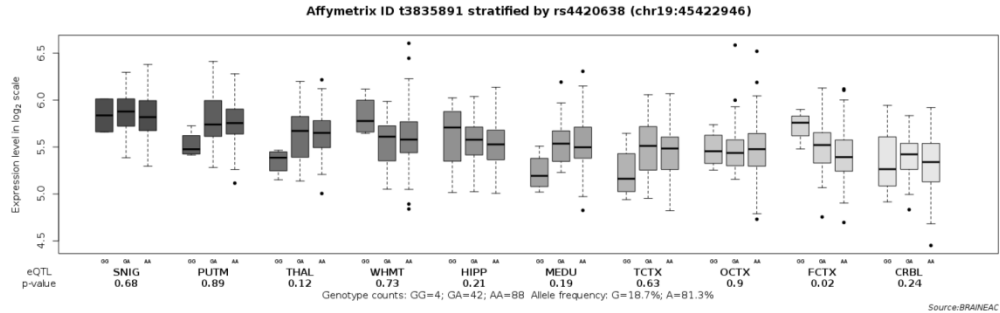

**B**

Rs56131196

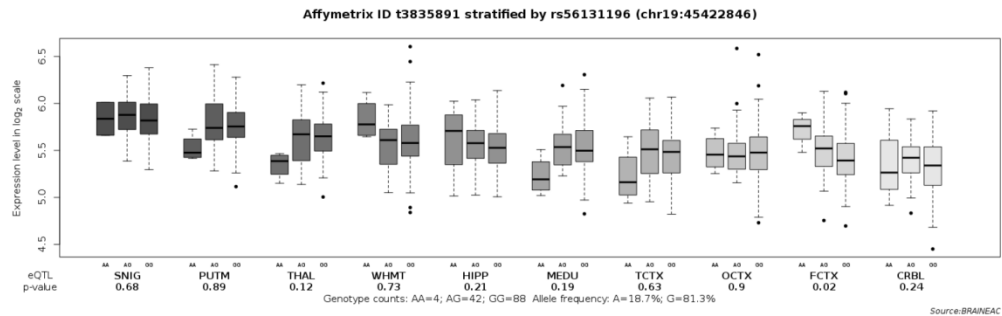

**C**

Rs157582

**Cis-eQTLs**

| P-value               | SNP      | SNP Chr. | SNP Chr. Position | Probe    | Probe Chr. | Probe Chr. position | SNP Alleles | Minor Allele | Z-score | Gene name | FDR  |
|-----------------------|----------|----------|-------------------|----------|------------|---------------------|-------------|--------------|---------|-----------|------|
| 0.0024085489331829367 | rs157582 | 19       | 50088059          | 11060519 | 19         | 50286067            | T/C         | T            | 3.03    | GEMIN7    | 0.41 |

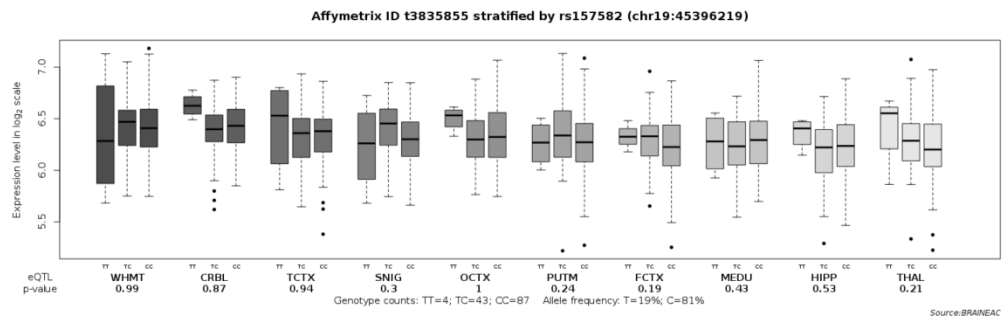

**Supplementary Figure 6. Bioinformatics analyses.** Abbreviations: Chr, chromosome; CRBL, cerebellar cortex; eQTL, expression quantitative trait loci; FCTX, frontal cortex; FDR, false discovery rate; HIPPO, hippocampus; log, logarithm; MEDU, medulla; OCTX, occipital cortex; PUTM, putamen; SNIG, substantia nigra; SNP, single nucleotide polymorphism; TCTX, temporal cortex; THAL, thalamus; WHMT, intralobular white matter.
